# Supplementary material for: In situ doping of epitaxial diamond with germanium by microwave plasma CVD in GeH4–CH4–H2 mixtures with optical emission spectroscopy monitoring
Source: Royal Society of Chemistry journal article supplement (doi:10.1039/d3cp03967f), 2023-01-01
Supplement: d3cp03967f1.pdf [file d3cp03967f1.pdf]

## ***In situ* doping of epitaxial diamond with germanium by microwave plasma CVD in GeH<sub>4</sub>-CH<sub>4</sub>-H<sub>2</sub> mixtures with optical emission spectroscopy monitoring**

Vladimir Yurov\*<sup>a</sup>, Andrey Bolshakov<sup>a</sup>, Victor Ralchenko\*<sup>ab</sup>, Irina Fedorova<sup>a</sup>, Artem Martyanov<sup>a</sup>, Pavel Pivovarov<sup>a</sup>, Vladimir Artemov<sup>c</sup>, Andrew Khomich<sup>ad</sup>, Roman Khmel'nitskiy<sup>e</sup> and Kirill Boldyrev<sup>f</sup>

<sup>a</sup>*Prokhorov General Physics Institute, Russian Academy of Sciences, Vavilov str. 38, Moscow 119991, Russia*

<sup>b</sup>*Harbin Institute of Technology, 92 Xidazhi Str., 150001 Harbin, P.R. China*

<sup>c</sup>*Shubnikov Institute of Crystallography of Federal Scientific Research Centre "Crystallography and Photonics", Russian Academy of Sciences, 119333 Moscow, Russia*

<sup>d</sup>*Institute of Radio Engineering and Electronics, Russian Academy of Sciences, 141190 Fryazino, Russia*

<sup>e</sup>*Lebedev Physics Institute, Russian Academy of Sciences, 117924 Moscow, Russia*

<sup>f</sup>*Institute for Spectroscopy, Russian Academy of Sciences, 108840, Moscow, Troitsk, Russia*

### SUPPLEMENTARY INFORMATION

#### **1. Dynamics of CH band intensity with CH<sub>4</sub> and GeH<sub>4</sub> addition in the GeH<sub>4</sub>-CH<sub>4</sub>-H<sub>2</sub> plasma**

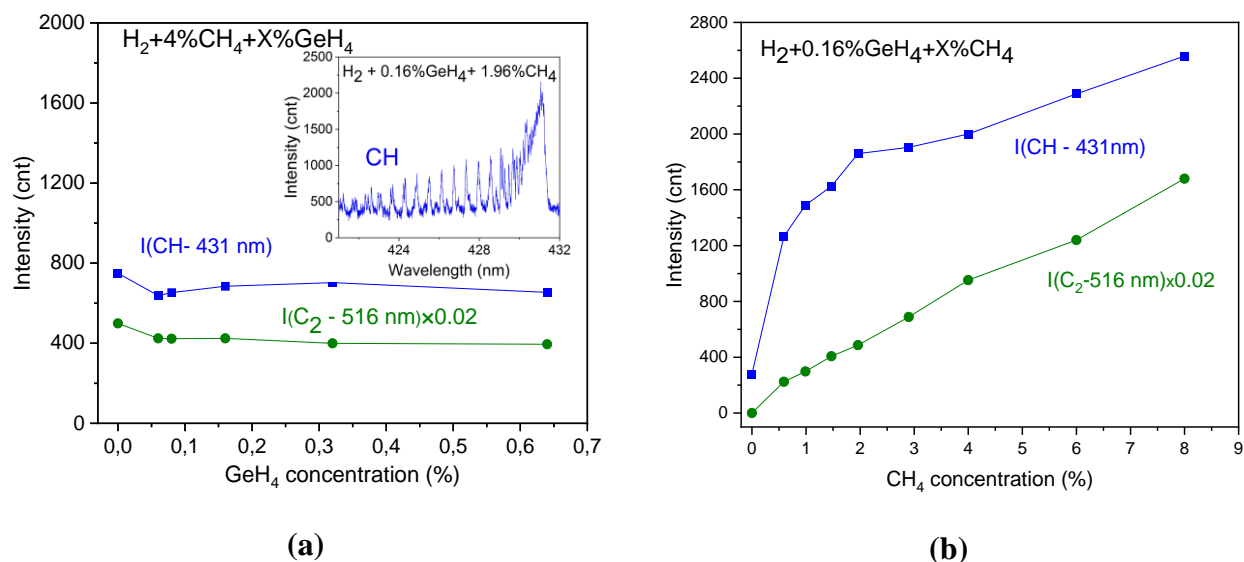

Fig. S1. Comparison of intensity variations for CH band (head line at  $\lambda=431$  nm) and C<sub>2</sub> band ( $\lambda=516$  nm) with addition of GeH<sub>4</sub> in H<sub>2</sub> – 4%CH<sub>4</sub> plasma. Pressure 100 Torr, MW power 2.5 kW (a). Evolutions for CH band (431 nm) and C<sub>2</sub> band (516 nm) with addition of CH<sub>4</sub> in H<sub>2</sub> – 0.16%GeH<sub>4</sub> plasma. Pressure 100 Torr, MW power 3.0 kW (b).

## 2. Excitation temperature $T_{\text{exc}}$ for $\text{H}_2+4\%\text{CH}_4+\text{GeH}_4$ plasma

The  $T_{\text{exc}}$  was estimated from the Boltzmann plot for relative intensities of the Balmer series lines (Figure S2a). It was assumed that the population density of excited hydrogen atoms follows the Boltzmann law [S1,S2]:

$$\ln(I_{ij}\lambda/g_jA_{ij}) = (-E_i/k_B T_{\text{exc}}) + C \quad (1)$$

where  $I_{ij}$  is relative intensity of the emission line corresponding to transition between the energy levels  $i$  and  $j$ ,  $\lambda_{ij}$  its wavelength,  $g_i$  is the degeneracy or statistical weight of the emitting upper level  $i$  of the transition,  $A_{ij}$  is the transition probability for spontaneous radiative emission from the level  $i$  to the lower level  $j$ ,  $E_i$  is the excitation energy of level  $i$ , and  $C$  is a constant. The constants  $g_i$  and  $A_{ij}$  ( $j=2$ ) are tabulated in Ref. [S3]. The excitation temperature was determined by plotting  $\ln(I_{ij}\lambda/g_jA_{ij})$  as a function of the upper level energy  $E_i$ , the slope of which is equal to  $-1/k_B T_{\text{exc}}$ . The intensities of Balmer series lines were corrected for spectral sensitivity of spectrometer-detector system by preliminary calibration of spectrometer with using light-measuring wide-range incandescent lamp SIRSh 6-40. We found increasing trends both with  $\text{GeH}_4$  and  $\text{CH}_4$  addition (Figure S2b).

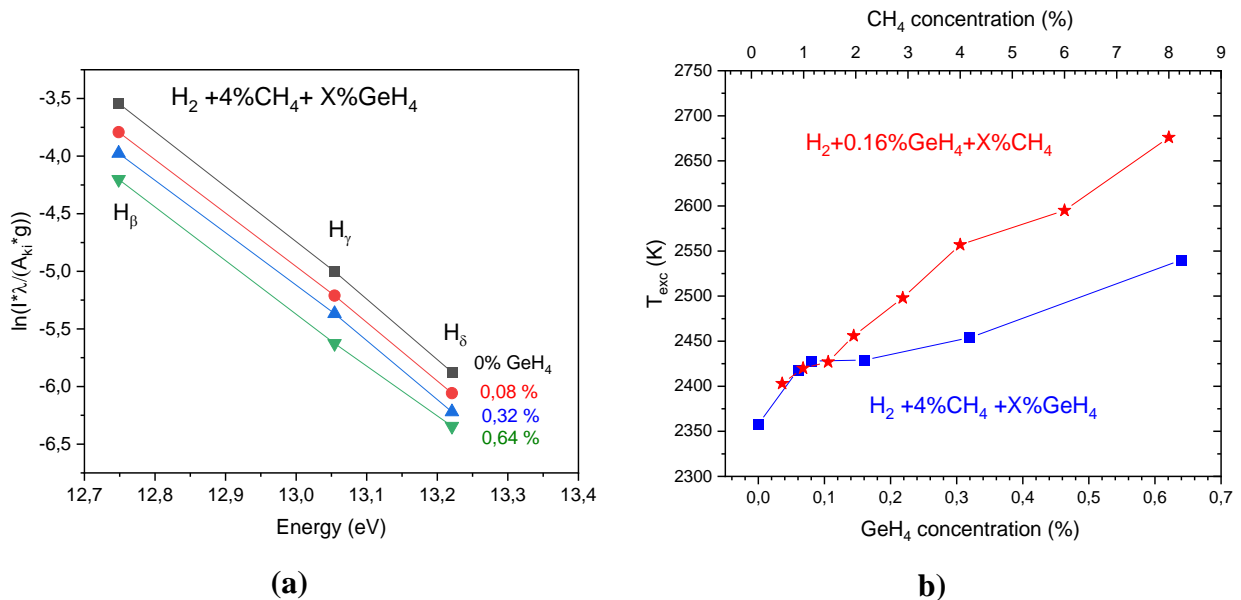

Fig. S2. (a) Boltzmann plot for  $\text{H}_\beta$ ,  $\text{H}_\gamma$  and  $\text{H}_\delta$  line intensities of Balmer series for  $\text{H}_2+4\%\text{CH}_4+\text{GeH}_4$  plasma with  $\text{GeH}_4$  concentrations of 0% (squares), 0.06% (circles) and 0.32% (triangles up) and 0.64% (triangles down). (b). Excitation temperature  $T_{\text{exc}}$  as function of  $\text{CH}_4$  concentration (stars) and of  $\text{GeH}_4$  concentration (squares). Pressure 100 Torr, MW power 2.5 kW.

### 3. Polishing of epitaxial diamond film. Evaluation of thickness of the removed layer

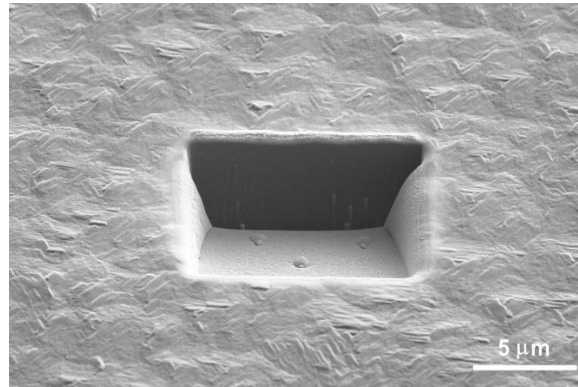

Fig. S3. SEM image of a pit produced on the as-grown surface by focused ion beam milling to serve a reference point for evaluation of the thickness of the removed layer upon polishing. The pit lateral size is  $6 \times 8 \mu\text{m}^2$  and the maximum depth of 5  $\mu\text{m}$ . The bottom of the pit is inclined.

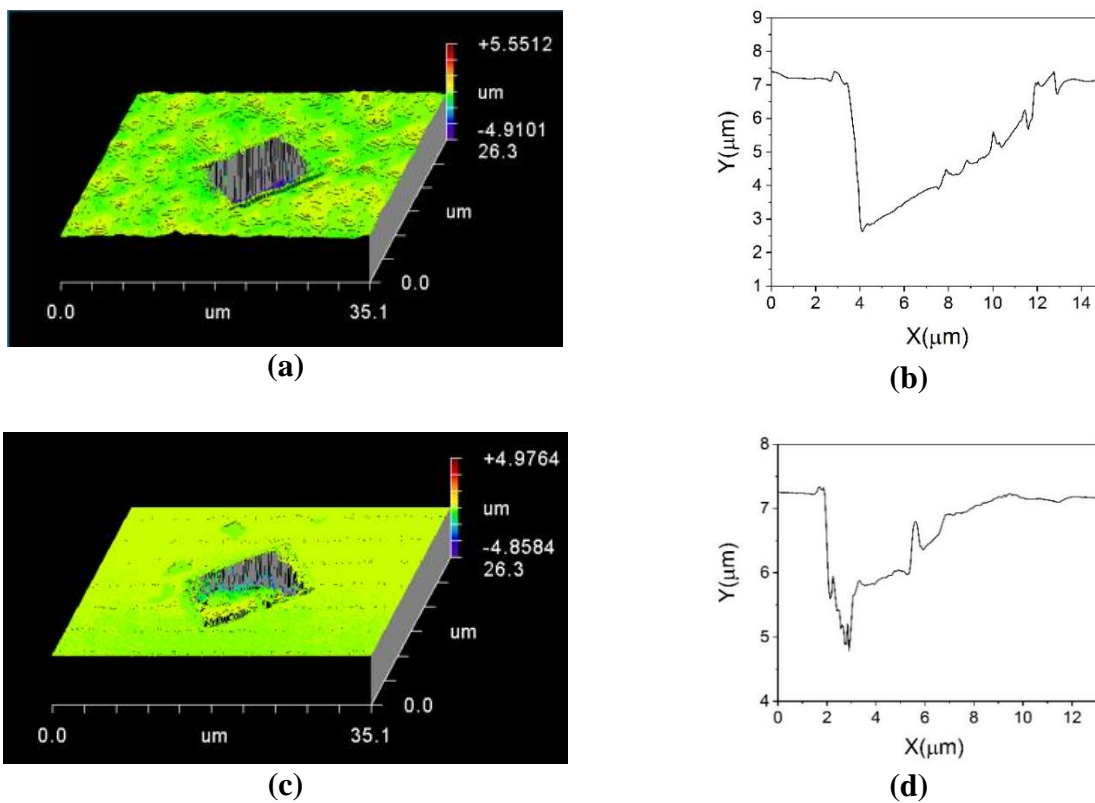

Fig. S4. Optical profilometer (ZYGO NewView5000) images of surface relief of as-grown (111) oriented sample (a,b) and after polishing and cleaning in ultrasonic bath (c,d). A pit with lateral size of  $6 \times 8 \mu\text{m}$  and maximum depth of  $5 \mu\text{m}$  produced on as-grown surface by focused ion beam milling served a reference point to evaluate the thickness of the removed layer. The bottom of the pit is inclined. The image area is  $35 \times 26 \mu\text{m}^2$ . The profiles on the right panel are traced across the pit. The change in the pit depth after the polishing indicates the thickness of the removed layer of  $\approx 2 \mu\text{m}$ .

#### 4. PL spectra for (111) Ge-doped film at low temperatures

The ZPL GeV width remained almost the same at temperatures decreasing from 308 to 77K (Fig. S5), that is ascribed to significant stress in the film. In contrast, SiV ZPL reduced in width (FWHM) and increased in intensity by a factor of five at 77K.

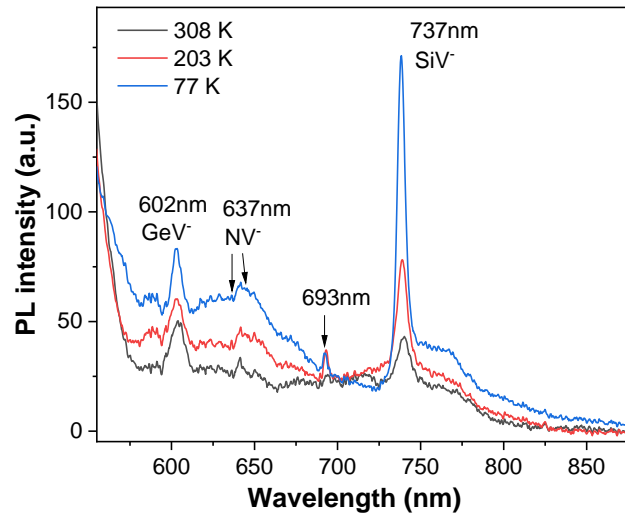

Fig. S5. PL spectra of Ge-doped (111) diamond film at temperatures of 308, 203 and 77K. The spectra are vertically shifted for clarity. The peak at 693 nm is not identified. The PL excitation wavelength is 450 nm. The GeV peak does not narrow at low-T because of high stress induced broadening.

#### 5. PL spectrum of epitaxial film on (100) substrate

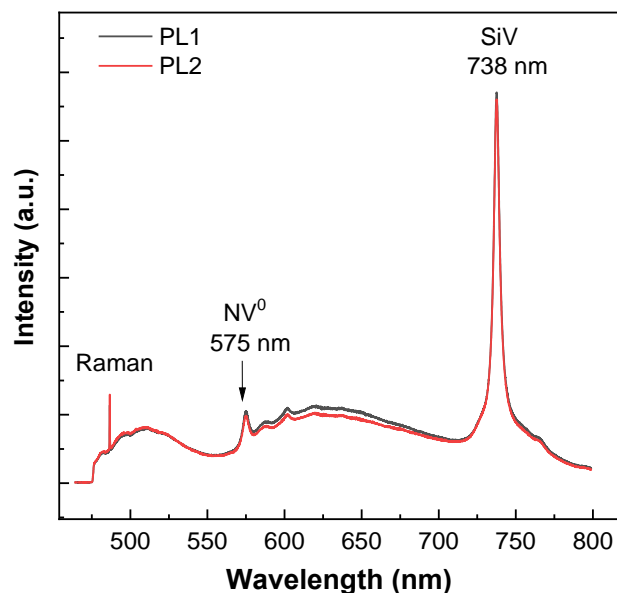

Fig. S6. Photoluminescence spectrum at R.T for epitaxial film on (100) substrate. The process parameters, including GeH<sub>4</sub> concentration in gas mixture, were identical to those for the film on the (111) substrate. The spectra are taken in two arbitrary chosen locations, PL1 and PL2, on the film

surface. The PL excitation wavelength  $\lambda = 473$  nm. Besides Raman peak, two other features are NV<sup>0</sup> ZPL at 575 nm with a phonon band at longer wavelengths, and SiV<sup>-</sup> ZPL at 738 nm, while no GeV peak near 602 nm is observed.

## 6. PL spectra for epitaxial film grown with reduced germane concentration (0.28% GeH<sub>4</sub>) on (111) oriented substrate

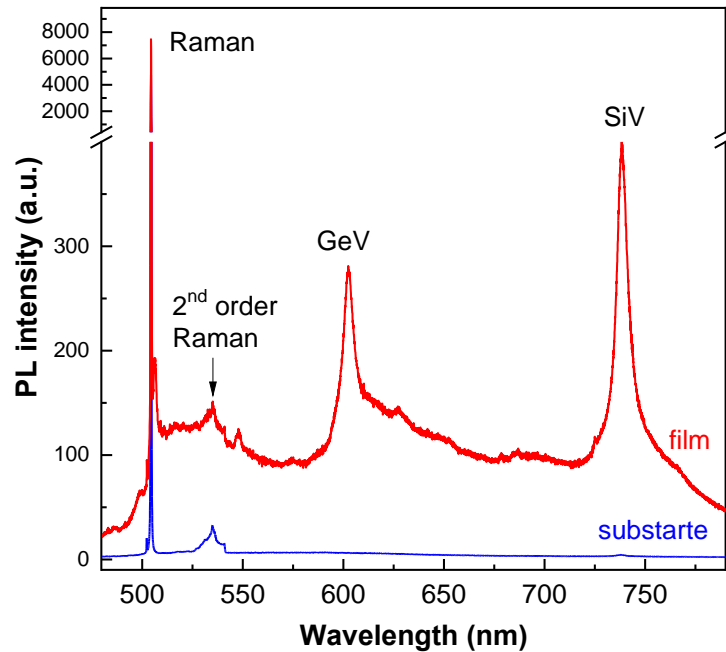

Fig. S7. PL spectra at room temperature for Ge-doped diamond film with thickness of 3.5  $\mu\text{m}$  (top spectrum), and for the (111) oriented substrate (bottom spectrum). The film is grown at reduced germane concentration of 0.28% GeH<sub>4</sub>. Excitation wavelength of 457 nm. No features associated with NV PL are seen.

## 7. Photoluminescence spectra deconvolution for annealed (111) oriented film

The PL spectrum measured at room temperature for the Ge-doped sample (0.8% GeH<sub>4</sub>) annealed in vacuum at 1400°C for 1 h was deconvoluted to 9 individual peaks, including GeV ZPL (Fig. S8). The deconvolution was performed for the spectrum converted to energy scale (in eV). All the deconvolution components were fit with Gaussian profiles. The fit accuracy is high, with the Residual Sum of Squares of as small as  $4 \times 10^{-4}$ .

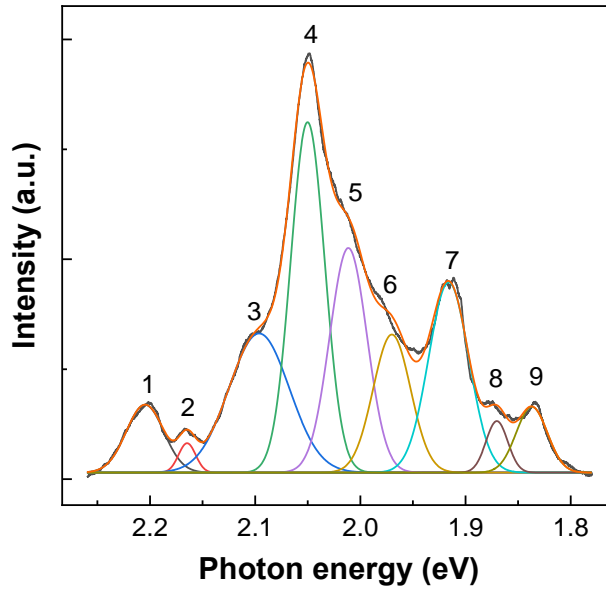

Fig. S8. Deconvolution of the PL spectrum measured at room temperature (black color) and synthesized spectrum (red color) for the (111) oriented Ge-doped sample annealed in vacuum at 1400°C for 1 h. Nine individual peaks, including GeV ZPL are fit with Gaussian profiles. The components are numerated consequently from left to right. See Table S1 for the fit details.

Table S1. Position and width (FWHM) of components of PL spectrum deconvolution for (111) oriented Ge-doped sample annealed in vacuum at 1400°C.

| Peak # | Peak position (eV/nm) | Peak width (eV/nm) | Assignment                   | Ref     |
|--------|-----------------------|--------------------|------------------------------|---------|
| 1      | 2.205/562.4           | 0.036/11.6         | divacancy and a foreign atom | [S4]    |
| 2      | 2.165/572.8           | 0.016/ 3.9         | not identified               |         |
| 3      | 2.096/591.5           | 0.057/18.5         | divacancy and a foreign atom | [S4]    |
| 4      | 2.050/604.8           | 0.032/8.8          | GeV ZPL                      | [S5]    |
| 5      | 2.011/616.5           | 0.036/10.1         | GeV LVM*                     | [S6,S7] |
| 6      | 1.970/629.4           | 0.036/10.1         | GeV phonon band              | [S7]    |
| 7      | 1.916/647.2           | 0.038/9.3          | divacancy and a foreign atom | [S4]    |
| 8      | 1.870/663.0           | 0.021/10.0         | not identified               |         |
| 9      | 1.8370/675.0          | 0.0230/10.5        | divacancy and a foreign atom | [S4]    |

\*Local vibration mode with Ge atom

## References

- [S1] V.Yu. Yurov, V.G. Ralchenko, A.K. Martyanov, I.A. Antonova, V.S. Sedov, A.A. Khomich, V.V. Voronov, S.S. Savin, M.Y. Shevchenko and A.P. Bolshakov, *J. Vac. Sci. Technol. A* 2021, **39**, 023002.
- [S2] N. Konjević, S. Jovićević, and M. Ivković, *Phys. Plasmas*, 2009, **16**, 103501.

- [S3] W.L. Wiese, M.W. Smith and B.M. Glennon, *Atomic Transition Probabilities*. Vol. 1, National Bureau of Standards, Washington DC, 1966.
- [S4] A.M. Zaitsev. Optical Properties of Diamond. Data Handbook, Springer Science & Business Media, 2013, p. 229.
- [S5] T. Iwasaki, F. Ishibashi, Y. Miyamoto, Y. Doi, S. Kobayashi, T. Miyazaki, K. Tahara, K.D. Jahnke, L.J. Rogers, B. Naydenov, F. Jelezko, S. Yamasaki, S. Nagamachi, T. Inubushi, N. Mizuochi, M. Hatano, Germanium-vacancy single color centers in diamond, *Sci. Rep.* 5 (2015) 12882.
- [S6] E.A. Ekimov, S.G. Lyapin, K.N. Boldyrev, M.V. Kondrin, R. Khmel'nitskiy, V.A. Gavva, T.V. Kotereva, M.N. Popova, Germanium–vacancy color center in isotopically enriched diamonds synthesized at high pressures, *JETP Lett.* 102 (2015).
- [S7] K.N. Boldyrev, B.N. Mavrin, P.S. Sherin, M.N. Popova, Bright luminescence of diamonds with Ge-V centers, *J. Luminescence* 193 (2018) 119–124.
